# Supplementary material for: NKX3.1 Localization to Mitochondria Suppresses Prostate Cancer Initiation
Source: Oxford University Press journal article supplement (doi:10.1158/2159-8290.cd-20-1765), 2021-04-23
Supplement: 21598290cd201765-sup-256833_2_supp_7058548_qrpjb1.xlsx [file 21598290cd201765-sup-256833_2_supp_7058548_qrpjb1.xlsx]

## Sheet: Index
Name	Description	Sheet
Table S1	Analyses of NKX3.1-dependent protection against oxidative stress in vivo
Table S1A	ROS levels analyses in the anterior prostate after short-term Paraquat treatment	Table S1A
Table S1B	ROS levels analyses in the seminal vesicle after short-term Paraquat treatment	Table S1B
Table S1C	Phenotypic analyses in the anterior prostate after long-term Paraquat treatment	Table S1C
Table S2	Electron microscopy of mitochondrial phenotype in response to oxidative stress in vivo
Table S2A	Electron microscopy analyses of mitochondrial phenotype in the anterior prostate	Table S2A
Table S2B	Electron microscopy analyses of mitochondrial phenotype in the seminal vesicle	Table S2B
Table S3	Analyses of silencing of endogenous NKX3.1 following oxidative stress in human prostate cells in vitro
Table S3A	Silencing of NKX3.1 in LNCaP cells	Table S3A
Table S3B	Silencing of NKX3.1 followed by rescue with exogenous NKX3.1 in LNCaP cells	Table S3B
Table S3C	Silencing of NKX3.1 and/or HSPA9 in LNCaP cells	Table S3C
Table S3D	Silencing of NKX3.1 combined with MitoQ rescue in LNCaP cells	Table S3D
Table S3E	Silencing of NKX3.1 in BPH1 cells	Table S3E
Table S4	Gain-of-function analyses of exogenous NKX3.1 following oxidative stress in human prostate cells in vitro
Table S4A	Gain-of-function of NKX3.1 in RWPE1 cells	Table S4A
Table S4B	Gain-of-function combined with MitoQ rescue in RWPE1 cells	Table S4B
Table S4C	Gain-of-function combined with HPSA9 silencing in RWPE1 cells	Table S4B
Table S5	Gain-of-function analyses of NKX3.1 mutated proteins following oxidative stress in human prostate cells in vitro
Table S5A	Gain-of-function of NKX3.1 mutated proteins in RWPE1 cells	Table S5A
Table S5B	Gain-of-function of NKX3.1 mutated proteins combined with MitoQ in RWPE1 cells	Table S5B
Table S5C	Gain-of-function of NKX3.1 truncated proteins combined with MitoQ in RWPE1 cells	Table S5C
Table S6	Subcellular localization analyses of NKX3.1 following oxidative stress in human prostate cells in vitro
Table S6A	Time-course analyses in RWPE1 cells	Table S6A
Table S6B	Protein import and export inhibition analyses in RWPE1 cells	Table S6B
Table S7	Description of the human prostate primary organotypic cultures used in this study	Table S7
Table S8	Clinical and pathological features of the human prostate cancer cohorts	Table S8
Table S9	List of antibodies used in this study	Table S9
Table S10	Description of primers and shRNA in this study	Table S10

## Sheet: Table S1A
Table S1A. ROS levels analyses in the anterior prostate after short-term Paraquat treatment
Genotype	Treatment	Number of mice	Normalized Image J Intensity
			DHE	p value	CM-H2DCFDA	p value
Nkx3.1+/+	Vehicle	9	30 ± 4.6	ns	53 ± 10.2	ns
	Paraquat	11	40.67 ± 5		57.7 ± 8.7
Nkx3.1-/-	Vehicle	11	32 ± 6.1	0.0001	57 ± 5.6	0.0007
	Paraquat	14	104.68 ± 6.4		98.7 ± 4.2
Legend: Mice at 3 months of age were treated for 1 month with paraquat (or vehicle) and sacrificed for analysis at 4 months of age. Data are expressed as mean ± SD. p value was calculated by comparing Vehicle vs Paraquat for each genotype, using two-sample unpaired Welch t-test and indicates statistical significance (p<0.01). ns, not significant

## Sheet: Table S1B
Table S1B. ROS levels analyses in the seminal vesicle after short-term Paraquat treatment
Genotype	Treatment	Number of mice	Normalized Image J Intensity
			DHE	p value	CM-H2DCFDA	p value
Nkx3.1+/+	Vehicle	9	100 ± 8.95	ns	100 ± 11.20	ns
	Paraquat	11	100 ± 9.23		100 ± 7.24
Nkx3.1-/-	Vehicle	11	100 ± 3.57	ns	100 ± 8.33	ns
	Paraquat	14	100 ± 6.23		100 ± 13.20
Legend: Mice at 3 months of age were treated for 1 month with paraquat (or vehicle) and sacrificed for analysis at 4 months of age. Data are expressed as mean ± SD. p value was calculated by comparing Vehicle vs Paraquat for each genotype, using two-sample unpaired Welch t-test and indicates statistical significance (p<0.01). ns, not significant

## Sheet: Table S1C
Table S1C. Phenotypic analyses in the anterior prostate after long-term Paraquat treatment
Genotype	Treatment	Number of mice	Phenotype (% PIN)
			Normal	p value	PIN1/	p value	PIN3/	p value
					PIN2		PIN4
Nkx3.1+/+	Vehicle	18	34.33 ± 2.64	ns	60.34 ± 3.62	ns	5.33 ± 2.51	ns
	Paraquat	18	35.83 ± 2.49		56.84 ± 3.84		7.33 ± 2.79
Nkx3.1-/-	Vehicle	26	24.37 ± 3.01	0.0002	46.28 ± 3.64	<0.0001	29.35 ± 2.71	<0.0001
	Paraquat	28	8.27 ± 3.06		13.33 ± 2.84		78.40 ± 3.09
Legend: Mice at 3 months of age were treated for 9 months with paraquat (or vehicle) and sacrificed for analysis at 12 months of age. H&E stained sections were scored by a pathologist (RV) to determine %PIN. Data are expressed as mean percentage ± SD. p value was calculated by comparing Vehicle vs Paraquat for each genotype, using Chi-square (and Fisher’s exact) test and indicates statistical sig…

## Sheet: Table S2A
Table S2A. Electron microscopy analyses of mitochondrial phenotype in the anterior prostate
Genotype	Treatment	Mouse	Total number of images	Number of mitochondria	p value	Area of mitochondria	p value
		#
Nkx3.1+/+	Vehicle	1	62	365	ns	36.75	ns
		2	62	363		33.44
		3	62	362		34.35
		4	62	360		36.89
				362.5 ± 1.04		35.36 ± 0.86
	Paraquat	5	64	409		33.7
		6	64	342		32.78
		7	64	401		36.95
		8	64	443		37.72
				398.8 ± 20.99		35.29 ± 1.20
Nkx3.1-/-	Vehicle	9	64	376	0.0004	34.91	<0.0001
		10	64	440		40.21
		11	64	362		32.39
		12	64	446		38.32
				406 ± 21.59		36.46 ± 1.74
	Paraquat	13	62	189		19.77
		14	62	114		18.2
		15	62	174		11.54
		16	62	219		15.35
				174 ± 22.08		16.22 ± 1.80
Legend: Mice at 3 months of age were treated for 9 months with paraquat (or vehicle) and sacrificed for analysis at 12 months of age. Quantification of relative number of mitochondria and relative mitochondrial area was done using Image J. Data are expressed as mean ± SD. p value was calculated by comparing Vehicle vs Paraquat for each genotype, using two-sample unpaired Welch t-test and indicate…

## Sheet: Table S2B
Table S2B. Electron microscopy analyses of mitochondrial phenotype in the seminal vesicle
Genotype	Treatment	Mouse	Total number of images	Number of mitochondria	p value	Area of mitochondria	p value
		#
Nkx3.1+/+	Vehicle	1	60	370	ns	175.75	ns
		2	60	258		190.72
		3	60	288		248.11
		4	60	301		282.18
				304.3 ± 23.69		224.2 ± 24.84
	Paraquat	5	60	286		218.45
		6	60	244		215.76
		7	60	300		219.32
		8	60	313		280.74
				285.8 ± 14.97		233.6 ± 15.74
Nkx3.1-/-	Vehicle	9	64	376	ns	234.07	ns
		10	64	440		223.51
		11	64	362		238.71
		12	64	446		209.54
				279.8 ± 14.16		226 ± 6.47
	Paraquat	13	62	252		225.11
		14	62	321		198.14
		15	62	325		196.75
		16	62	331		249.65
				307.3 ± 18.53		217.4 ± 12.57
Legend: Mice at 3 months of age were treated for 9 months with paraquat (or vehicle) and sacrificed for analysis at 12 months of age. Quantification of relative number of mitochondria and relative mitochondrial area was done using Image J. Data are expressed as mean ± SD. p value was calculated by comparing Vehicle vs Paraquat for each genotype, using two-sample unpaired Welch t-test and indicate…

## Sheet: Table S3A
Table S3A. Silencing of NKX3.1 in LNCaP cells
Expression vector	Treatment	Total number	DHE	p value	CM-H2DCFDA	p value	MitoSOX	p value
shControl	Vehicle	12	7581.4 ± 315.5	ns	3605 ± 184.5	ns	4002.7 ± 113.2	ns
shNKX3.1#1		12	7589.5 ± 210		3529.1 ± 212.5		4120.3 ± 114.4
shNKX3.1#2		9	7587.8 ± 312		3554.3 ± 226.4		4089.8 ± 199.4
shControl	Paraquat	12	7592.3 ± 280.4	0.0004	3644.8 ± 203.3	<0.0001	4134 ± 178.4	<0.0001
shNKX3.1#1		12	10334.8 ± 320.9		7560.9 ± 214.1		8003 ± 143.3
shNKX3.1#2		9	10123.5 ± 331.4	0.0009	7324.6 ± 205.6	<0.0001	7987.4 ± 157.1	<0.0001
shControl	Vehicle	12	7632.3 ± 295.6	ns	3721 ± 194.5	ns	4094.6 ± 185.6	ns
shNKX3.1#1		12	7612.5 ± 240.3		3604.4 ± 199.7		4250.8 ± 134.2
shNKX3.1#2		9	7644.6 ± 225.6		3678.4 ± 201.2		4268.6 ± 158.3
shControl	Hypoxia	12	7642.7 ± 304.6	0.0006	3756.1 ± 188	<0.0001	4201 ± 101.5	<0.0001
shNKX3.1#1		12	10243.4 ± 340.3		7540.2 ± 203.5		7899.2 ± 122.2
shNKX3.1#2		9	10134.6 ± 289.5	0.001	7497.9 ± 210.5	<0.0001	7783.5 ± 115.4	<0.0001
shControl	Vehicle	12	7612.4 ± 320.4	ns	3804.6 ± 210.8	ns	4201 ± 120.5	ns
shNKX3.1#1		12	7603.2 ± 261.4		3505.1 ± 195.9		4304.8 ± 124.5
shNKX3.1#2		9	7610.5 ± 256.7		3603.6 ± 204.8		4296.7 ± 137.8
shControl	H2O2	12	7631.4 ± 290.9	0.0003	3754.7 ± 214.3	<0.0001	4159 ± 193.9	<0.0001
shNKX3.1#1		12	11423.3 ± 322.4		7734.5 ± 210.9		8034 ± 139.8
shNKX3.1#2		9	11056.5 ± 345.7	0.0008	7716.7 ± 200.5	<0.0001	7989.7 ± 151.4	<0.0001
Legend: ROS levels were analyzed by FACS using DHE fluorescence (for superoxide), CM-H2DCFDA fluorescence (for hydrogen peroxide) or MitoSOX (for mitochondrial-specific superoxide). ROS dyes were selected to minimize fluorescence overlap between cells and ROS moieties during FACS detection. Total number of replicates refers to number of biological replicates x number of technical replicates (e.g.…

## Sheet: Table S3B
Table S3B. Silencing of NKX3.1 followed by rescue with exogenous NKX3.1 in LNCaP cells
Expression vector	Treatment	Total number	DHE	p value	MitoSOX	p value
shControl	Vehicle	12	575 ± 39	ns	1100 ± 105	ns
shNKX3.1#1		12	589 ± 33		1150 ± 110
shNKX3.1#1 + NKX3.1		12	570 ± 41		1089 ± 74
shNKX3.1#1 + T164A		9	575 ± 35		1120 ± 55
shNKX3.1#1 + R52C		9	579 ± 38		1110 ± 99
shControl	Paraquat	12	583 ± 44		1087 ± 99
shNKX3.1#1		12	931 ± 43	0.007	1890 ± 71	<0.001
shNKX3.1#1 + NKX3.1		12	579 ± 31	ns	1130 ± 45	ns
shNKX3.1#1 + T164A		9	942 ± 29	0.003	1910 ± 66	<0.001
shNKX3.1#1 + R52C		9	948 ± 34	0.003	1895 ± 80	<0.001
Legend: ROS levels were analyzed by FACS using DHE fluorescence (for superoxide) or MitoSOX (for mitochondrial-specific superoxide). ROS dyes were selected to minimize fluorescence overlap between cells and ROS moieties during FACS detection. Total number of replicates refers to number of biological replicates x number of technical replicates (e.g. 4 independent biological replicates, each one in…

## Sheet: Table S3C
Table S3C. Silencing of NKX3.1 and/or HSPA9 in LNCaP cells
Expression vector	Treatment	Total number	DHE	p value	MitoSOX	p value
shControl	Vehicle	9	569 ± 32	ns	1088 ± 89	ns
shHSPA9#1		9	576 ± 38		1130 ± 78
shNKX3.1#1		9	578 ± 28		1155 ± 109
shNKX3.1#1 + shHSPA9#1		9	573 ± 35		1098 ± 83
shControl	Paraquat	9	574 ± 39		1095 ± 105
shHSPA9#1		9	929 ± 31	<0.001	1846 ± 75	<0.001
shNKX3.1#1		9	939 ± 41	0.003	1889 ± 64	<0.001
shNKX3.1#1 + shHSPA9#1		9	945 ± 28	<0.001	1878 ± 55	<0.001
Legend: ROS levels were analyzed by FACS using DHE fluorescence (for superoxide) or MitoSOX (for mitochondrial-specific superoxide). ROS dyes were selected to minimize fluorescence overlap between cells and ROS moieties during FACS detection. Total number of replicates refers to number of biological replicates x number of technical replicates (e.g. 3 independent biological replicates, each one in…

## Sheet: Table S3D
Table S3D. Silencing of NKX3.1 combined with MitoQ rescue in LNCaP cells
Expression vector	Treatment	Total number	DHE	p value	MitoSOX	p value
shNKX3.1#1	Vehicle	9	575 ± 39	ns	1125 ± 110	ns
shControl		9	550 ± 34		1100 ± 105
shNKX3.1#1+ NKX3.1		9	562 ± 31		1090 ± 99
shNKX3.1#1 + MitoQ		9	571 ± 40		1204 ± 104
shNKX3.1#1	Paraquat	9	925 ± 43	<0.001	1850 ± 103	<0.001
shControl		9	561 ± 41		1120 ± 100
shNKX3.1#1 + NKX3.1		9	568 ± 36		1085 ± 110
shNKX3.1# + MitoQ		9	564 ± 32		1100 ± 102
Legend: ROS levels were analyzed by FACS using DHE fluorescence (for superoxide) or MitoSOX (for mitochondrial-specific superoxide). ROS dyes were selected to minimize fluorescence overlap between cells and ROS moieties during FACS detection. Total number of replicates refers to number of biological replicates x number of technical replicates (e.g. 3 independent biological replicates, each one in…

[truncated: 13 more sheets: Table S3E, Table S4A, Table S4B, Table S4C, Table S5A, Table S5B, Table S5C, Table S6A, Table S6B, Table S7, Table S8, Table S9, Table S10]
